# Supplementary material for: Antibacterial Effects and Biocompatibility of Titania Nanotubes with Octenidine Dihydrochloride/Poly(lactic-co-glycolic acid)
Source: Hindawi journal article supplement (doi:10.1155/2015/836939), 2015-01-01

# Graphical abstract

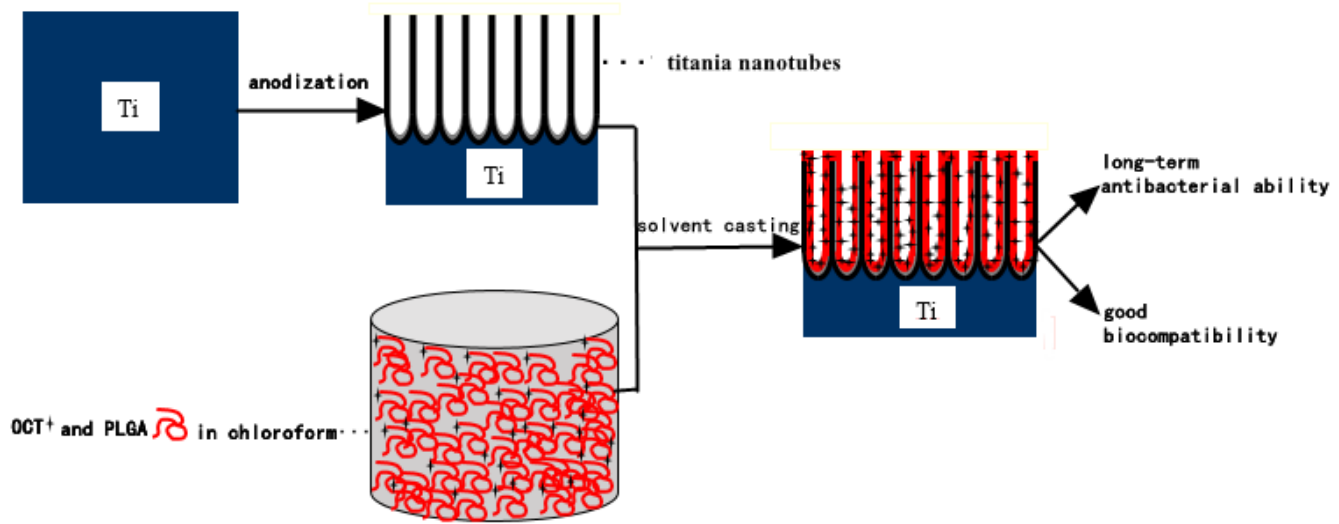

Supplement: f1 [file 836939.f1.pdf]
